# Supplementary material for: The impact of cognitive reserve on delayed neurocognitive recovery after major non-cardiac surgery: an exploratory substudy
Source: PubMed Central journal article supplement (PMC10701404; doi:10.3389/fnagi.2023.1267998), 2023-11-23
Supplement: Data_Sheet_2.pdf [file Data_Sheet_2.pdf]

## Supplementary Material

### The impact of cognitive reserve on delayed neurocognitive recovery after major non-cardiac surgery: an exploratory substudy

Elena Kainz, Neelke Juilfs, Ulrich Harler, Ursula Kahl, Caspar Mewes, Christian Zöllner, Marlene Fischer\*

\* Correspondence: Marlene Fischer: mar.fischer@uke.de

#### Supplementary material 2. Lost to follow-up.

|                                 | Complete datasets<br>n = 67 | Lost to follow-up<br>n = 26 | p-value |
|---------------------------------|-----------------------------|-----------------------------|---------|
| <b>Age (years)</b>              | 67 (63-74)                  | 69 (64-75)                  | 0.810   |
| <b>Sex</b>                      |                             |                             | 0.068   |
| <i>Female</i>                   | 20 (29.9)                   | 13 (50.0)                   |         |
| <i>Male</i>                     | 47 (70.1)                   | 13 (50.0)                   |         |
| <b>BMI (kg/m<sup>2</sup>)</b>   | 25.4 (23.3-28.1)            | 27.8 (25.6-29.7)            | 0.036   |
| <b>Obesity</b>                  | 9 (13.4)                    | 5 (19.2)                    | 0.525   |
| <b>Arterial hypertension</b>    | 34 (50.7)                   | 18 (69.2)                   | 0.107   |
| <b>Dyslipoproteinemia</b>       | 16 (23.9)                   | 8 (30.8)                    | 0.496   |
| <b>Diabetes mellitus</b>        | 7 (10.4)                    | 8 (30.8)                    | 0.017   |
| <b>Current smoking status</b>   | 14 (20.9)                   | 10 (38.5)                   | 0.082   |
| <b>OSAS</b>                     | 3 (4.5)                     | 0 (0.0)                     | 0.557   |
| <b>ASA</b>                      |                             |                             | 0.526   |
| <i>I</i>                        | 4 (6.0)                     | 1 (3.8)                     |         |
| <i>II</i>                       | 30 (44.8)                   | 8 (30.8)                    |         |
| <i>III</i>                      | 32 (47.8)                   | 16 (61.5)                   |         |
| <i>IV</i>                       | 1 (1.5)                     | 1 (3.8)                     |         |
| <b>Education</b>                |                             |                             | 0.744   |
| < <i>highschool</i>             | 44 (65.7)                   | 18 (69.2)                   |         |
| ≥ <i>highschool</i>             | 23 (34.3)                   | 8 (30.8)                    |         |
| <b>CFQ</b>                      | 22 (16-30)                  | 16 (9-25)                   | 0.028   |
| <b>MMSE</b>                     | 28 (28-29)                  | 28 (27-29)                  | 0.452   |
| <b>Duration of surgery, min</b> | 203 (150-305)               | 298 (190-425)               | 0.006   |
| <b>Estimated blood loss, ml</b> | 300 (50-700)                | 675 (100-1500)              | 0.014   |
| <b>Epidural anesthesia</b>      | 42 (62.7)                   | 19 (73.1)                   | 0.344   |
| <b>Sufentanil, µg</b>           | 75 (55-100)                 | 93 (60-135)                 | 0.072   |

|                                      |               |               |       |
|--------------------------------------|---------------|---------------|-------|
| <b>Type of anesthesia</b>            |               |               | 0.136 |
| <i>Inhalational</i>                  | 62 (92.5)     | 21 (80.8)     |       |
| <i>TIVA</i>                          | 5 (7.5)       | 5 (19.2)      |       |
| <b>Surgical discipline</b>           |               |               | 0.027 |
| <i>General surgery</i>               | 28 (41.8)     | 19 (73.1)     |       |
| <i>Urology</i>                       | 32 (47.8)     | 4 (15.4)      |       |
| <i>Gynecology</i>                    | 6 (9.0)       | 3 (11.5)      |       |
| <i>Traumatology</i>                  | 1 (1.5)       | 0 (0.0)       |       |
| <b>Length of hospital stay, days</b> | 10 (5-16)     | 13 (6-34)     | 0.141 |
| <b>CRIq total score</b>              | 119 (110-132) | 118 (105-125) | 0.288 |
| <b>CRIq subscore (leisure)</b>       | 121 (109-130) | 122 (108-128) | 0.807 |
| <b>CRIq subscore (working)</b>       | 114 (103-129) | 103 (98-122)  | 0.194 |
| <b>CRIq subscore (education)</b>     | 111 (103-125) | 108 (105-111) | 0.253 |

**Supplementary material 2.** *ASA* American Society of Anesthesiologists, *BMI* Body mass index, *CFQ* Cognitive Failures Questionnaire, *CRIq* Cognitive Reserve Index questionnaire, *DNCR* Delayed neurocognitive recovery, *OSAS* Obstructive sleep apnea syndrome, *TIVA* Total intravenous anesthesia. For group comparisons (lost to follow-up vs. complete datasets) the Mann-Whitney U-test (continuous variables), Chi-square test, or Fisher's exact test (categorical variables) were used as appropriate. Continuous variables are presented as median with interquartile range. Categorical variables are presented as absolute and relative numbers.
