# Supplementary material for: The impact of cognitive reserve on delayed neurocognitive recovery after major non-cardiac surgery: an exploratory substudy
Source: PubMed Central journal article supplement (PMC10701404; doi:10.3389/fnagi.2023.1267998), 2023-11-23
Supplement: Data_Sheet_3.pdf [file Data_Sheet_3.pdf]

## *Supplementary Material*

### **The impact of cognitive reserve on delayed neurocognitive recovery after major non-cardiac surgery: an exploratory substudy**

**Elena Kainz, Neelke Juilfs, Ulrich Harler, Ursula Kahl, Caspar Mewes, Christian Zöllner, Marlene Fischer\***

\* **Correspondence:** Marlene Fischer: mar.fischer@uke.de

#### **Supplementary file 3.** Sensitivity analysis.

|                                       | <b>OR</b> | <b>95% CI<br/>(lower)</b> | <b>95% CI<br/>(upper)</b> | <i>p</i> |
|---------------------------------------|-----------|---------------------------|---------------------------|----------|
| <b>First step</b>                     |           |                           |                           |          |
| Age (per year increase)               | 0.941     | 0.840                     | 1.054                     | 0.293    |
| ASA physical status I&II <sup>a</sup> | 0.930     | 0.208                     | 4.166                     | 0.925    |
| Epidural anesthesia <sup>b</sup>      | 2.960     | 0.508                     | 17.255                    | 0.228    |
| Sufentanil (per µg increase)          | 0.040     | 0.001                     | 2.548                     | 0.129    |
| Duration of surgery                   | 0.175     | 0.006                     | 4.893                     | 0.305    |
| CRIq total score                      | 0.937     | 0.885                     | 0.993                     | 0.027    |
| <b>Last step</b>                      |           |                           |                           |          |
| Sufentanil (per µg increase)          | 0.030     | 0.001                     | 1.333                     | 0.070    |
| CRIq total score                      | 0.935     | 0.884                     | 0.988                     | 0.017    |

**Supplementary file 3.** Multivariable logistic regression for the association between clinically relevant variables and delayed neurocognitive recovery (dependent variable). Variables were eliminated stepwise backwards. Patients, who were tested with the Montreal Cognitive Assessment were excluded from the analysis. ASA American Society of Anesthesiologists. The variables ‘sufentanil’ and ‘duration of surgery’ were logarithmized to achieve normal distribution. <sup>a</sup>Reference: ASA III. <sup>b</sup>Reference: no epidural anesthesia.
